# Supplementary material
Source: ML conference proceedings conference paper supplement (https://aclanthology.org/2022.findings-emnlp.158)
Supplement: note [file 2022.findings-emnlp.158.note.pdf]

For the ethical concerns in the reviews, we have described the details of the annotation process in the rebuttal and supplied them in the camera-ready version. Please refer to appendix B, in which we explain 1) how we recruited and paid the annotators, 2) definition of the task, 3) details of the annotation process.

Our annotation task is to annotate logical programs for numerical reasoning on two public datasets, DROP and AWPNI. What the annotators need to do is to understand the English texts and transform the necessary content into programs. The judgments in the annotation are objective and should not be affected by the demographics of the annotators. Therefore, we think this makes it unnecessary to collect any demographic information from the annotators and we didn't.
